# Supplementary material for: Headspace volatiles profiles of different spring varieties and a wild relative of wheat flour
Source: Royal Society of Chemistry journal article supplement (doi:10.1039/d4fo01022a), 2024-01-01
Supplement: d4fo01022a1.pdf [file d4fo01022a1.pdf]

## 1 Headspace volatiles profiles of different spring varieties and a wild relative 2 of wheat flour.

3 Deepa Agarwal<sup>a,c\*</sup>, William MacNaughtan<sup>a</sup>, Chujiao Liu<sup>a</sup>, Julie King<sup>b</sup>, and Tim J. Foster<sup>a</sup>

4 a Division of Food Sciences, School of Biosciences, University of Nottingham, Sutton  
5 Bonington Campus, Loughborough, LE12 5RD, UK.

6 b Division of Plant Sciences, School of Biosciences, University of Nottingham, Sutton  
7 Bonington Campus, Loughborough, LE12 5RD, UK

8 c School of Agriculture, Biomedicine and Environment, La Trobe University, Bundoora,  
9 Victoria, Australia, 3086.

10 \* Corresponding author email: 14.deepaagarwal@gmail.com

### 11 Supplementary Data

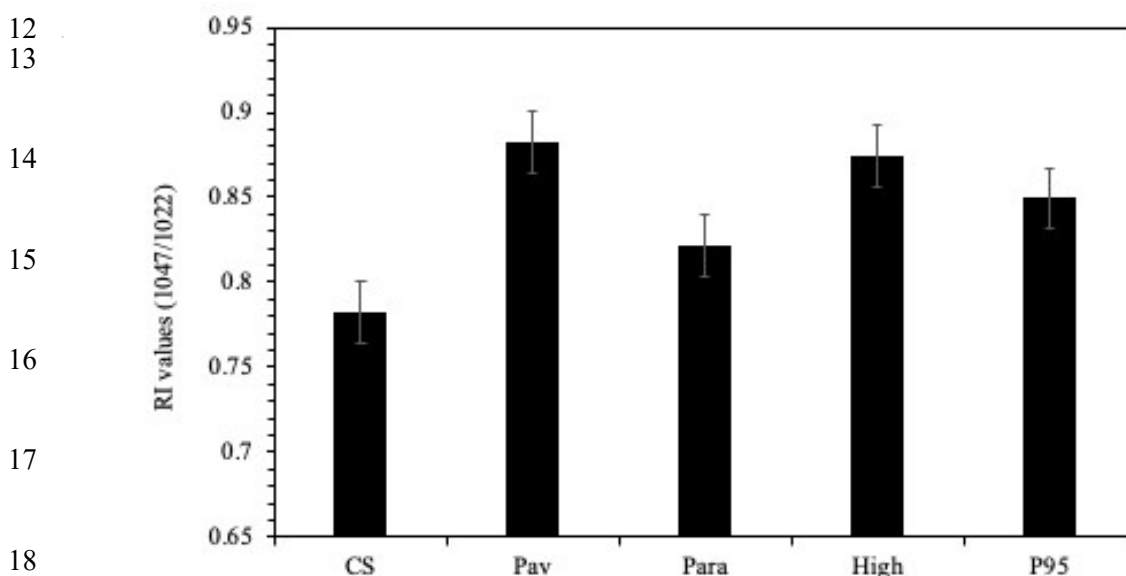

19 **Figure S1:** IR ratio of the absorbances  $1047/1020\text{ cm}^{-1}$  for different wheat flours. IR ratio was  
20 calculated by extracting IR absorbance values at  $1047$  and  $1022\text{ cm}^{-1}$  from the vector  
21 normalised spectra after water subtraction, baseline correction and deconvolution. The bands  
22 at  $1047$  and  $1022\text{ cm}^{-1}$  generally associated with the ordered and amorphous structures of  
23 starch, respectively. The ratio of absorbance can be used to quantify the degree of “order” in  
24 starch [ordered starch] samples (VanSoest et al., 1995).

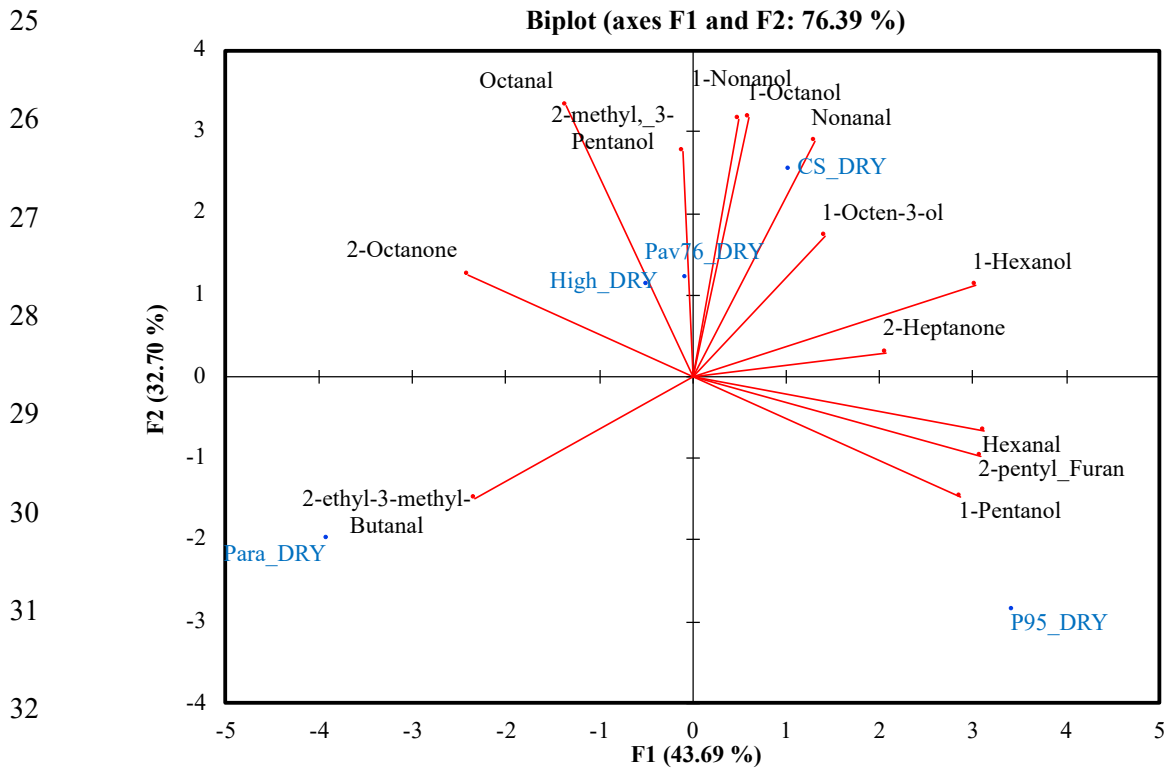

33 **Figure S2:** The principal component analysis (PCA) based on the relative content of volatile  
 34 compounds generated by different whole wheat dry flour (without water) of Chinese spring  
 35 (CS), Pavon76 (Pav76), Highbury (High), Paragon (Para) and wild relative (P95).

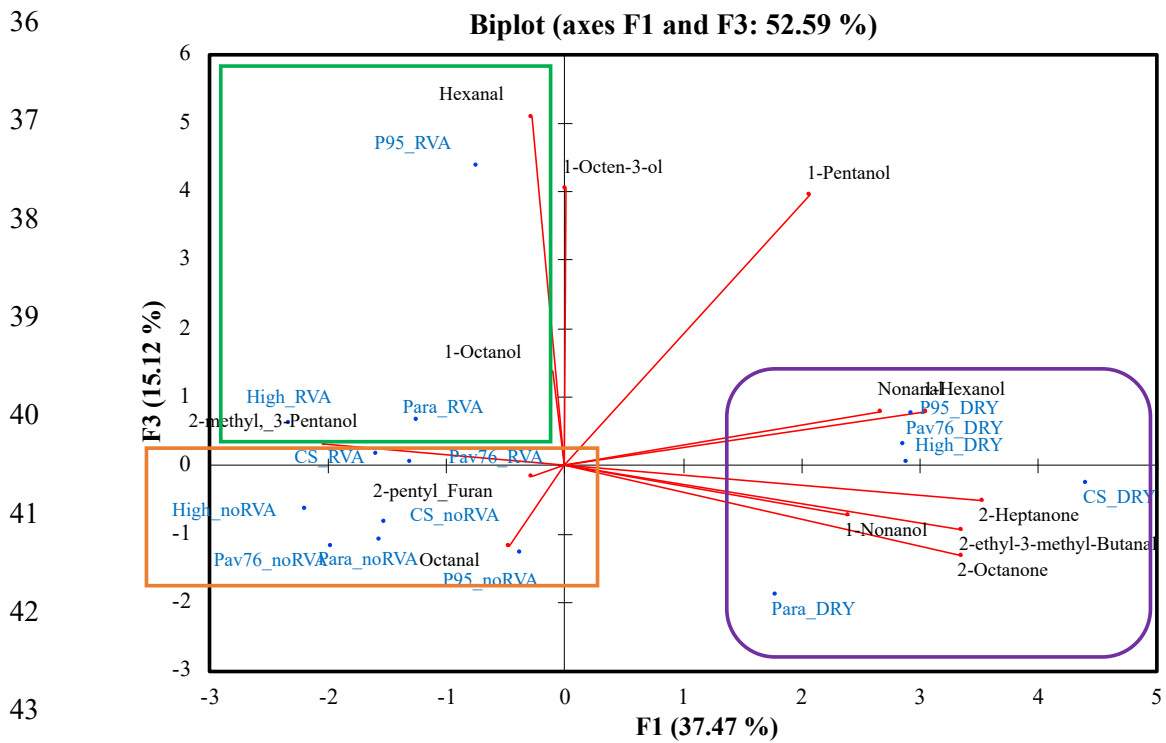

44 **Figure S3:** *The principal component analysis (PCA) based on the relative content of volatile*  
 45 *compounds generated by different whole wheat dry flour (without water), before and after RVA*  
 46 *(flour with water) of Chinese spring (CS), Pavon76 (Pav76), Highbury (High), Paragon (Para)*  
 47 *and wild relative P95.*

48 **Table S1:** Fatty acid composition (mg/g of wheat) of different wheat varieties such as Chinese  
 49 spring (CS), Pavon76 (Pav76), Highbury (High), Paragon (Para) and a wild relative P95. A  
 50 significant difference ( $p < 0.05$ ) between the samples is indicated by different letters “abc” on  
 51 the same column.

| <b>Wheat Variety</b> | <b>Pentadecanoic 14</b> | <b>Elaidic acid</b> | <b>Linoleic acid</b> | <b>Linolenic acid</b> | <b>11-Eicosenoate</b> |
|----------------------|-------------------------|---------------------|----------------------|-----------------------|-----------------------|
| CS                   | 1.940 a                 | 4.423 b             | 19.691 c             | 0.426 b               | 1.766 b               |
| P95                  | 2.019 a                 | 6.700 a             | 14.483 d             | 0.258 d               | 2.939 a               |
| High                 | 1.771 b                 | 4.309 b             | 20.684 c             | 0.467 a               | 0.829 c               |
| Pav76                | 1.574 c                 | 3.712 c             | 22.841 b             | 0.458 a               | 0.960 c               |
| Para                 | 0.487 d                 | 3.113 d             | 30.528 a             | 0.312 c               | 0.860 c               |
| Pr > F(Model)        | <0.0001                 | <0.0001             | <0.0001              | <0.0001               | <0.0001               |

52
